# Supplementary material for: Ratiometric fluorescence assay based on carbon dots and Cu2+-catalyzed oxidation ofO-phenylenediamine for the effective detection of deferasirox
Source: Royal Society of Chemistry journal article supplement (doi:10.1039/d1ra07078a), 2021-01-01
Supplement: d1ra07078a1.pdf [file d1ra07078a1.pdf]

Ratiometric fluorescence assay based on carbon dots and Cu<sup>2+</sup>-catalyzed oxidation of *O*-Phenylenediamine for the effective detection of deferasirox

Chen-Fang Miao<sup>a,#</sup>, Xian-Zhong Guo<sup>b,#,\*</sup>, Xin-Tian Zhang<sup>a</sup>, Yin-Ning Lin<sup>a</sup>, Wen-Di Han<sup>b</sup>, Zheng-Jun Huang<sup>a</sup>, Shao-Huang Weng<sup>a,\*</sup>

a. Department of Pharmaceutical Analysis, School of Pharmacy, Fujian Medical University, Fuzhou 350122, China

b. Department of Pharmacy, First Affiliated Hospital of Fujian Medical University, Fuzhou, Fujian 350005, PR China

\*Corresponding Author: Shaohuang Weng, e-mail: shweng@fjmu.edu.cn; Xianzhong Guo, e-mail: gxzsly@163.com

#: Equally contributed to this work

**List of supplementary information**

- (1) Synthesis of b-CDs without post-treatment
- (2) The supplementary figures
- (3) The corresponding equation and the illustration of the equation for the discussion of the mechanism
- (4) The supplementary tables

### (1) Synthesis of b-CDs without post-treatment

A 0.1 g m-phenylenediamine (MPD) was dissolved in 10 mL acetone using ultrasound to obtain a homogeneous solution. The solution was transferred to a 50 mL hydrothermal reactor and heated at 160 °C for 10 h. After cooling, the product was filtered by 0.22 μm filter membrane. The filtrate was purified through dialysis for 24 h with water changed every 4 h. After lyophilization, the obtained b-CDs were stored at 4 °C.

### (2) The supplementary figures

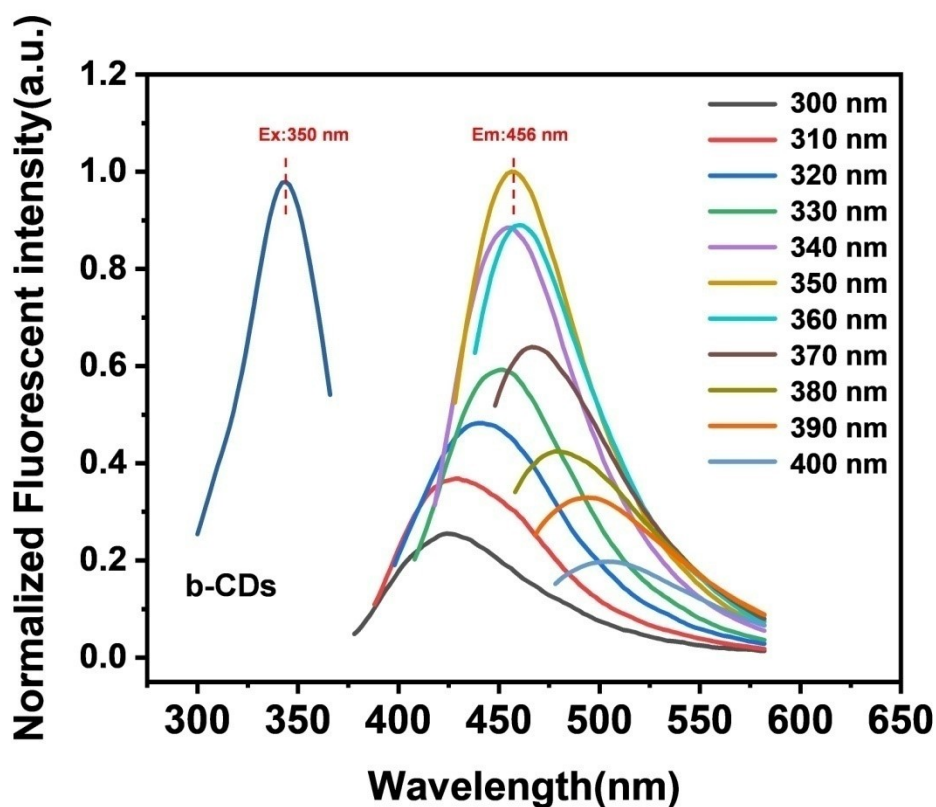

Fig. S1. The maximum excitation and emission fluorescence spectra of b-CDs with variable excitation.

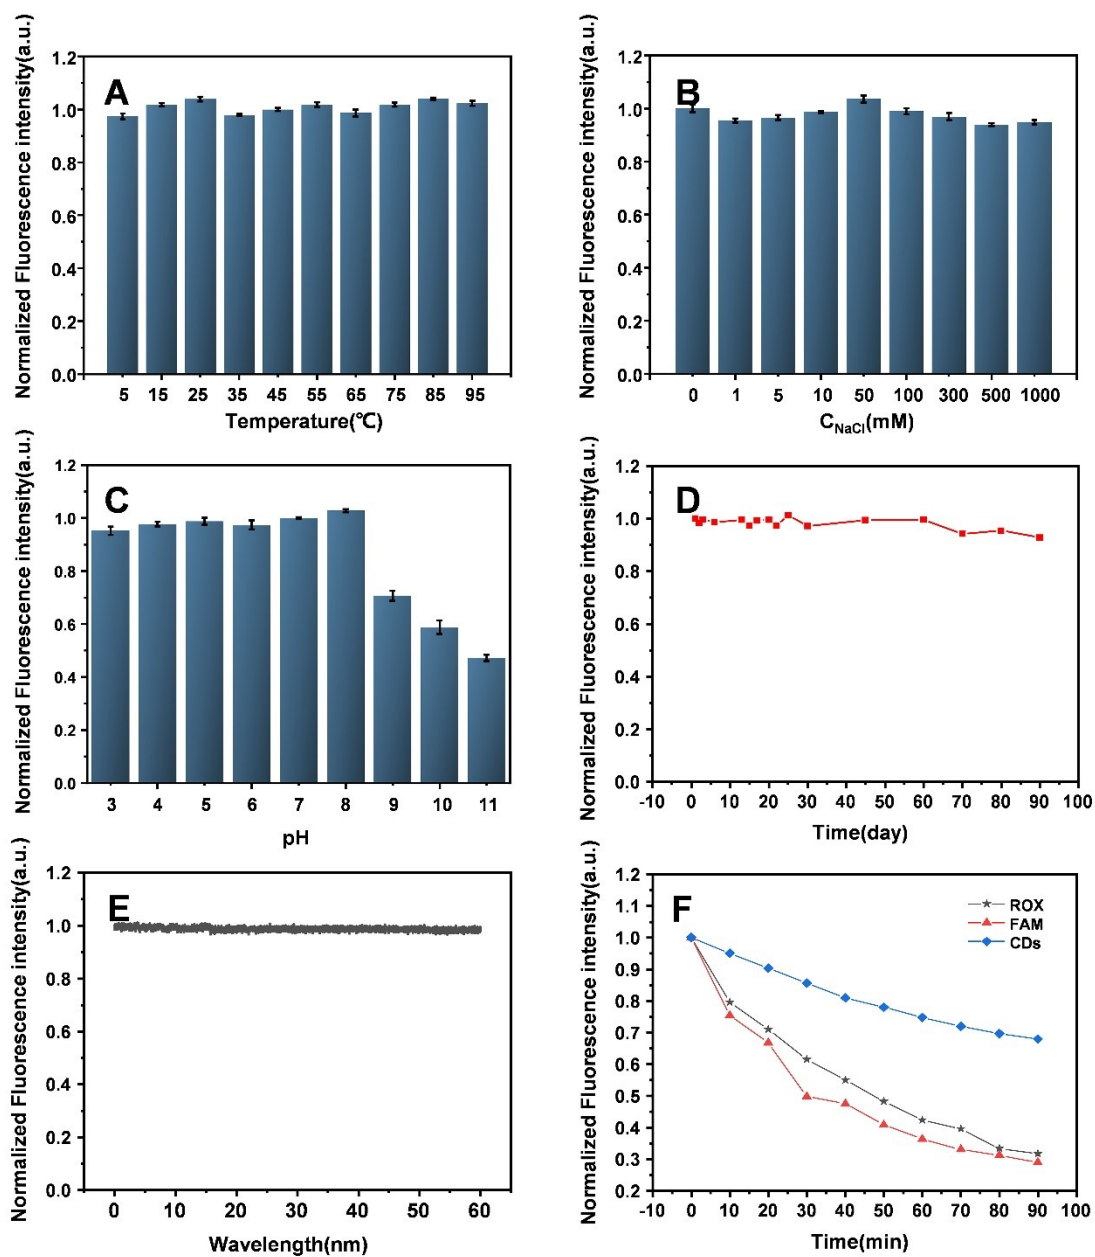

Fig. S2. The normalized fluorescence intensity of CDs at different temperatures (A), NaCl concentrations (B), pH (C), stored at room temperature for 90 days (D), continuous excitation at 370 nm for 60 min (E), and continuous irradiation at 365nm for 90 min under a 300W xenon lamp with the comparison of commercial dyes (ROX and FAM) (F).

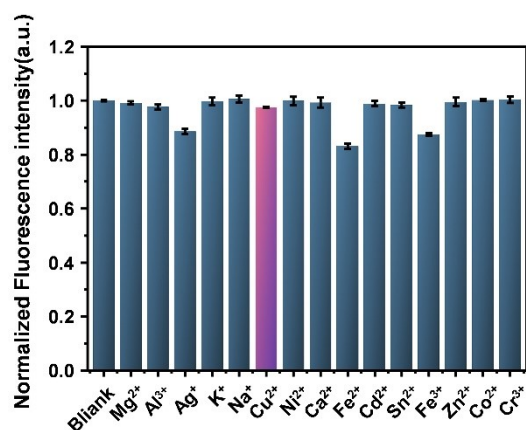

Fig. S3. Fluorescence responses of CDs to 100  $\mu\text{M}$  metal ions ( $\text{Mg}^{2+}$ ,  $\text{Al}^{3+}$ ,  $\text{Ag}^+$ ,  $\text{K}^+$ ,  $\text{Na}^+$ ,  $\text{Cu}^{2+}$ ,  $\text{Ni}^{2+}$ ,  $\text{Ca}^{2+}$ ,  $\text{Fe}^{2+}$ ,  $\text{Cd}^{2+}$ ,  $\text{Sn}^{2+}$ ,  $\text{Fe}^{3+}$ ,  $\text{Zn}^{2+}$ ,  $\text{Co}^{2+}$ , and  $\text{Cr}^{3+}$ ).

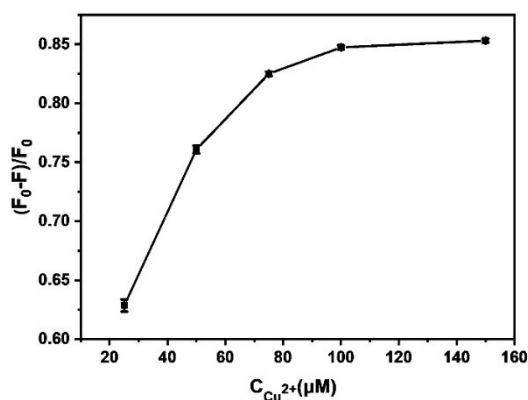

Fig. S4. The effect of the different concentrations (25, 50, 75, 100, 150  $\mu\text{M}$ ) of  $\text{Cu}^{2+}$  on the fluorescence intensity of the system of CDs and OPD with excitation at 370 nm.  $F$  and  $F_0$  are the fluorescence intensity with and without  $\text{Cu}^{2+}$ , respectively.

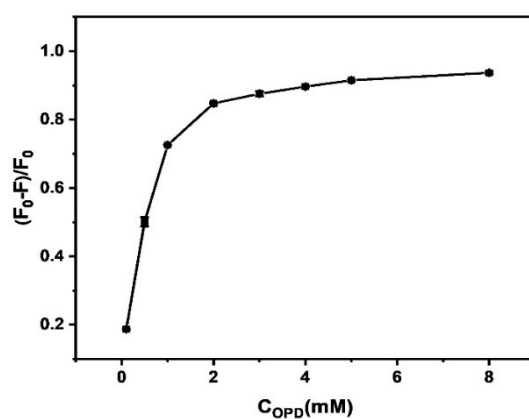

Fig. S5. The effect of different concentrations (0.1, 0.5, 1, 2, 3, 4, 5, 8 mM) of OPD on the fluorescence intensity of CDs+ $\text{Cu}^{2+}$  with excitation at 370 nm.  $F$  and  $F_0$  are the fluorescence intensity with and without OPD, respectively.

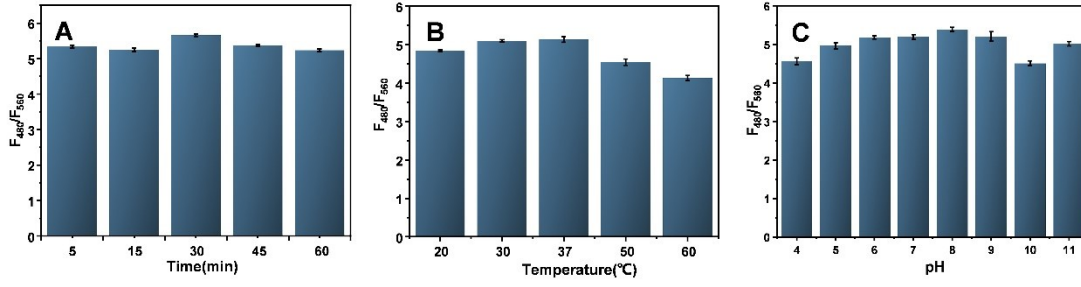

Fig. S6. The effect of the time (A), temperature (B) and pH (C) on the variable  $F_{480}/F_{560}$  in CDs-Cu-OPD with DEF.  $F_{480}$  and  $F_{560}$  represent the fluorescence intensity of CDs (480 nm) and oxOPD (560 nm), respectively

### (3) The corresponding equation and the illustration of the equation for the discussion of the mechanism

$$\frac{C}{\Delta A} = \frac{1}{\Delta \varepsilon} + \frac{1}{\Delta \varepsilon K_a} \times \frac{1}{[OPD]}$$

Formula S1

$C$  is concentration of CDs,  $K_a$  is association constant;  $\Delta A$  is the change of the absorbance of CDs with and without oxOPD at  $\lambda_{416nm}$ ,  $[OPD]$  is the concentration of OPD, and  $\Delta \varepsilon$  is the change in absorption coefficient.

$$\log \frac{F_0 - F}{F} = \log K_b + n \log [OPD]$$

Formula S2

$$\frac{F_0}{F} = 1 + K_q \tau_0 [OPD]$$

Formula S3

$$E = 1 - \frac{F}{F_0}$$

Formula S4

The  $F$  and  $F_0$  are the fluorescence intensities of CDs in CDs-Cu-OPD with and without OPD, respectively;  $[OPD]$  is concentration of OPD,  $K_b$  is the binding constant and  $n$  is a number of binding sites;  $K_q$  is the steady state quenching constant and  $\tau_0$  is fluorescence decay lifetime of CDs;  $E$  is the energy transfer efficiency.

$$R_0^6 = 8.8 \times 10^{-25} K^2 N^{-4} \Phi J$$

Formula S5

$K^2$  is the dipole orientation factor (in fluid solution,  $K^2$  is 2/3 for random orientation),  $N$  is the refractive index of the solvent, and  $\Phi$  is the quantum yield of the CDs ( $\Phi=0.212$ ), and  $J$  ( $J=1.38 \times 10^{-14} \text{cm}^{-3} \cdot \text{L} \cdot \text{mol}^{-1}$ ) is the spectral overlap integral between the CDs' emission and the oxOPD extinction coefficient, which was calculated from Formula 6:

$$J = \frac{\int_0^{\infty} F(\lambda)\varepsilon(\lambda)\lambda^4 d\lambda}{\int_0^{\infty} F(\lambda) d\lambda}$$

Formula S6

The  $\lambda$  is the wavelength, and  $F(\lambda)$  is the corrected fluorescence intensity of the donor (CDs) in the wavelength range from  $\lambda$  to  $(\lambda+d\lambda)$  with the total intensity normalized to unity, while  $\varepsilon(\lambda)$  is the molar absorption coefficient of the receptor at  $\lambda$ .

$$r_0 = R_0 \left( \frac{1}{E} - 1 \right)^{\frac{1}{6}}$$

Formula S7

The  $r_0$  is the distance between donor and acceptor; Energy transfer efficiency (E) is calculated from Formula 4. Critical transfer distance ( $R_0$ ) is calculated from Formula 5.

#### (4) The supplementary tables

Table S1. Detection result of DEF in Deferasirox-dispersible tablets

| Specification<br>(mg/tablet) | Measured content<br>(mg/tablet) | Labeled<br>percentage<br>content<br>(%) | RSD<br>(n=3; %) |
|------------------------------|---------------------------------|-----------------------------------------|-----------------|
| 125                          | 125.8                           | 103.6                                   | 4.3             |

Table S2. The results of the recovery experiment of DEF in the serum samples

| Serum<br>samples | Added<br>( $\mu\text{M}$ ) | Measured<br>( $\mu\text{M}$ ) | Recovery<br>(%) | RSD<br>(n=3; %) |
|------------------|----------------------------|-------------------------------|-----------------|-----------------|
| 1                | 2                          | 1.96                          | 98.00           | 2.12            |
|                  | 4                          | 3.86                          | 96.50           | 0.730           |
| 2                | 4                          | 4.09                          | 102.3           | 2.82            |
|                  | 6                          | 6.20                          | 103.3           | 0.860           |

|   |   |      |       |       |
|---|---|------|-------|-------|
| 3 | 2 | 2.19 | 109.5 | 2.45  |
|   | 4 | 4.08 | 102.0 | 0.530 |

Table S3. A comparison of different analytical methods for the detection of deferasirox

| Analytical method                         | Sample matrix                      | Linear range ( $\mu\text{g/mL}$ ) | LOD ( $\mu\text{g/mL}$ ) | Ref.      |
|-------------------------------------------|------------------------------------|-----------------------------------|--------------------------|-----------|
| CE-UV(SI-sweeping-FASS-MEKC)              | plasma                             | 1.0-20.0                          | 0.3                      | 1         |
| Electrochemical (MWCNT paste electrode)   | tablets and urine                  | 0.060-6.19                        | 0.038                    | 2         |
| PL(AgNPs-Tb-Deferasirox)                  | Urine and pharmaceutical tablets   | $37.3-7.5 \times 10^4$            | 11.2                     | 3         |
| PL(CDs-Cu <sup>2+</sup> -Deferasirox)     | tablet and plasma                  | 0.5-20.0                          | 0.33                     | 4         |
| PL(DA-CDs)                                | plasma                             | 1.0-10.0                          | 0.6                      | 5         |
| PL(CDs-Cu <sup>2+</sup> -OPD-Deferasirox) | tablet and serum                   | 0.5-8.0                           | 0.38                     | This work |
| HPLC-UV(DLLME-DSS)                        | blood of patients with thalassemia | $2.0 \times 10^2-2.0 \times 10^5$ | 0.06                     | 6         |
| HPLC-UV(BrMmC)                            | Human Breast Milk                  | 0.01–1.0                          | 0.0026                   | 7         |
| HILIC/ESI/MS                              | plasma                             | 0.20-120.0                        | 0.1                      | 8         |
| LC/MS/MS                                  | plasma                             | 0.04-40                           | 0.04                     | 9         |

### Reference

- 1 H. Lin, K. Hsieh, S. Chiou, H. Kou and S. M. Wu, *J. Pharmaceut. Biomed.*, 2016, **131**, 497-502.
- 2 G. P. Fard and R. E. Sabzi, *Turk. J. Chem.*, 2018, **42**, 493-504.
- 3 J. Abolhasani, R. Naderali and J. Hassanzadeh, *Anal. Sci.*, 2016, **32**, 381-386.
- 4 W. Han, C. Miao, X. Zhang, Y. Lin, X. Hao, Z. Huang, S. Weng, X. Lin, X. Guo and J. Huang, *Anal. Chim. Acta*, 2021, **1179**, 338853.
- 5 C. Wang, P. Huang, H. Kou and S. Wu, *Sens. Actuators B Chem.*, 2020, **311**, 127916.
- 6 M. Golpayegani, R. Akramipour and N. Fattahi, *J. Pharmaceut. Biomed.*, 2021, **193**, 113735.
- 7 C. Onal, S. Tekkeli and A. Sagiroglu, *Chromatographia*, 2020, **83**, 1329-1333.
- 8 H. Pligoropoulou, A. Vonaparti and I. Panderi, *J. Chromatogr. B*, 2012, **893-894**, 114-120.
- 9 T. Li, Z. Cui, Y. Wang, W. Yang, D. Li, Q. Song, L. Sun, L. Ding, *J. Pharmaceut. Biomed.*, 2018, **151**, 145-150.
